# Supplementary material
Source: PubMed Central journal article supplement (PMC9434490)
Supplement: NIHMS1816622-supplement-1816622_Sup_Info.pdf [file NIHMS1816622-supplement-1816622_Sup_Info.pdf]

1

| <i>Non-Hodgkin Lymphoma</i>   |                        |                                                   |                                                  |         |
|-------------------------------|------------------------|---------------------------------------------------|--------------------------------------------------|---------|
| Characteristics               | Total<br>N= 137 (100%) | No P-I-M<br>antibiotic exposure<br>n= 116 (84.7%) | P-I-M<br>antibiotic<br>exposure<br>n= 21 (15.3%) | p-value |
| Gender                        |                        |                                                   |                                                  |         |
| Male                          | 93 (67.9)              | 79 (68.1)                                         | 14 (66.7)                                        | 0.897   |
| Female                        | 44 (32.1)              | 37 (31.9)                                         | 7 (33.3)                                         |         |
| Age – median [IQR]            | 61 [51-69]             | 60 [52-68]                                        | 63 [46-70]                                       | 0.843   |
| Center                        |                        |                                                   |                                                  |         |
| MSK                           | 72 (52.6)              | 54 (46.6)                                         | 18 (85.7)                                        | 0.001   |
| Penn                          | 65 (47.4)              | 62 (53.4)                                         | 3 (14.3)                                         |         |
| Performance status<br>(ECOG)  |                        |                                                   |                                                  |         |
| 0-1                           | 120 (87.6)             | 107 (93.9)                                        | 13 (72.2)                                        | 0.003   |
| ≥2                            | 12 (8.8)               | 7 (6.1)                                           | 5 (27.8)                                         |         |
| Missing                       | 5 (3.6)                |                                                   |                                                  |         |
| Previous lines of therapy     |                        |                                                   |                                                  |         |
| ≤4                            | 77 (56.2)              | 69 (59.5)                                         | 8 (38.1)                                         | 0.069   |
| >4                            | 60 (43.8)              | 47 (40.5)                                         | 13 (61.9)                                        |         |
| Disease status at infusion    |                        |                                                   |                                                  |         |
| Complete response             | 4 (2.9)                | 4 (3.4)                                           | 0 (0.0)                                          | 0.388   |
| Persistent disease            | 133 (97.1)             | 112 (96.6)                                        | 21 (100.0)                                       |         |
| Costimulatory domain          |                        |                                                   |                                                  |         |
| CD28                          | 72 (52.6)              | 58 (50.0)                                         | 14 (66.7)                                        | 0.159   |
| 4-1BB                         | 65 (47.4)              | 58 (50.0)                                         | 7 (33.3)                                         |         |
| Toxicity                      |                        |                                                   |                                                  |         |
| No                            | 33 (24.1)              | 32 (27.8)                                         | 1 (4.8)                                          | 0.023   |
| Yes                           | 103 (75.2)             | 83 (72.2)                                         | 20 (95.2)                                        |         |
| Missing                       | 1 (0.7)                |                                                   |                                                  |         |
| CRS                           |                        |                                                   |                                                  |         |
| No                            | 37 (27.0)              | 34 (29.3)                                         | 3 (14.3)                                         | 0.154   |
| Yes                           | 100 (73.0)             | 82 (70.7)                                         | 18 (85.7)                                        |         |
| ICANS/ Neurotoxicity          |                        |                                                   |                                                  |         |
| No                            | 91 (66.4)              | 83 (72.8)                                         | 8 (38.1)                                         | 0.002   |
| Yes                           | 44 (32.1)              | 31 (27.2)                                         | 13 (61.9)                                        |         |
| Missing                       | 2 (1.5)                |                                                   |                                                  |         |
| Complete response, Day<br>100 |                        |                                                   |                                                  |         |
| Yes                           | 62 (45.3)              | 55 (47.4)                                         | 7 (33.3)                                         | 0.340   |
| No                            | 75 (54.7)              | 61 (52.6)                                         | 14 (66.7)                                        |         |
| Vital status                  |                        |                                                   |                                                  |         |
| Alive                         | 88 (64.2)              | 82 (70.7)                                         | 6 (28.6)                                         |         |
| Dead                          | 49 (35.8)              | 34 (29.3)                                         | 15 (71.4)                                        |         |

2

3 **Supplementary Table 1. Antibiotic cohort: non-Hodgkin lymphoma patient characteristics**  
4 **by exposure to piperacillin-tazobactam, imipenem-cilastatin, or meropenem (P-I-M).** Non-  
5 Hodgkin lymphoma patients from Memorial Sloan Kettering Cancer Center (MSK) and the  
6 University of Pennsylvania (Penn) who received anti-CD19 CAR T immunotherapy (N= 137) were

7 assessed based upon exposure to piperacillin-tazobactam, imipenem-cilastatin, or meropenem  
8 (P-I-M) antibiotics in the 30 days before CAR T infusion and evaluated for clinical characteristics  
9 and outcomes. The baseline and clinical characteristics of the patients in each of these group was  
10 compared to assess for variables that are associated with exposure to these antibiotics. Vital  
11 status is noted within 24 months of follow-up after CAR T cell infusion.

12 Wilcoxon rank-sum tests were used to compare the pairwise association between continuous  
13 variables and a binary outcome, while Fisher's exact test was used to compare two categorical  
14 variables. Two-tailed P values less than 0.05 were considered statistically significant across all  
15 tests. All tests were two-sided and there was no adjustment for multiple comparisons.

16 *Abbreviations: No P-I-M antibiotic exposure: patients exposed to non-P-I-M plus patients who*  
17 *did not receive any antibiotics within the 4 weeks before CD19 CAR T cell infusion; IQR: inter-*  
18 *quartile range; NHL: non-Hodgkin lymphoma; ECOG: Eastern Cooperative Oncology Group;*  
19 *CRS: cytokine release syndrome; ICANS: immune effector cell-associated neurotoxicity*  
20 *syndrome*

21  
22  
23  
24  
25  
26  
27  
28  
29  
30  
31  
32  
33  
34  
35  
36  
37  
38  
39  
40

| <i>Acute Lymphoblastic Leukemia</i> |                       |                                                  |                                               |         |
|-------------------------------------|-----------------------|--------------------------------------------------|-----------------------------------------------|---------|
| Characteristics                     | Total<br>N= 91 (100%) | No P-I-M antibiotic<br>exposure<br>n= 65 (71.4%) | P-I-M<br>antibiotic exposure<br>n= 26 (28.6%) | p-value |
| Gender                              |                       |                                                  |                                               |         |
| Male                                | 66 (72.5)             | 49 (75.4)                                        | 17 (65.4)                                     | 0.334   |
| Female                              | 25 (27.5)             | 16 (24.6)                                        | 9 (34.6)                                      |         |
| Age - median [IQR]                  | 43 [28-59]            | 44 [30-60]                                       | 40 [28-58]                                    | 0.849   |
| Center                              |                       |                                                  |                                               |         |
| MSK                                 | 55 (60.4)             | 33 (50.8)                                        | 22 (84.6)                                     | 0.004   |
| Penn                                | 36 (39.6)             | 32 (49.2)                                        | 4 (15.4)                                      |         |
| Performance status (ECOG)           |                       |                                                  |                                               |         |
| 0-1                                 | 85 (93.4)             | 62 (96.9)                                        | 23 (95.8)                                     | 0.863   |
| ≥2                                  | 3 (3.3)               | 2 (3.1)                                          | 1 (4.2)                                       |         |
| Missing                             | 3 (3.3)               |                                                  |                                               |         |
| Previous lines of therapy           |                       |                                                  |                                               |         |
| ≤4                                  | 54 (59.3)             | 41 (63.1)                                        | 13 (50.0)                                     | 0.251   |
| >4                                  | 37 (40.7)             | 24 (36.9)                                        | 13 (50.0)                                     |         |
| Disease status at infusion          |                       |                                                  |                                               |         |
| Complete response                   | 22 (24.2)             | 16 (24.6)                                        | 6 (23.1)                                      | 0.877   |
| Persistent disease                  | 69 (75.8)             | 49 (75.4)                                        | 20 (76.9)                                     |         |
| Costimulatory domain                |                       |                                                  |                                               |         |
| CD28                                | 55 (60.4)             | 33 (50.8)                                        | 22 (84.6)                                     | 0.003   |
| 4-1BB                               | 36 (39.6)             | 32 (49.2)                                        | 4 (15.4)                                      |         |
| Toxicity                            |                       |                                                  |                                               |         |
| No                                  | 7 (7.7)               | 5 (7.8)                                          | 2 (7.7)                                       | 0.985   |
| Yes                                 | 83 (91.2)             | 59 (92.2)                                        | 24 (92.3)                                     |         |
| Missing                             | 1 (1.1)               |                                                  |                                               |         |
| CRS                                 |                       |                                                  |                                               |         |
| No                                  | 10 (11.0)             | 8 (12.3)                                         | 2 (7.7)                                       | 0.525   |
| Yes                                 | 81 (89.0)             | 57 (87.7)                                        | 24 (92.3)                                     |         |
| Neurotoxicity                       |                       |                                                  |                                               |         |
| No                                  | 27 (29.7)             | 15 (32.6)                                        | 12 (46.2)                                     | 0.254   |
| Yes                                 | 45 (49.4)             | 31 (67.4)                                        | 14 (53.8)                                     |         |
| Missing                             | 19 (20.9)             |                                                  |                                               |         |
| Complete response, Day 100          |                       |                                                  |                                               |         |
| Yes                                 | 55 (60.4)             | 44 (67.7)                                        | 11 (42.3)                                     | 0.046   |
| No                                  | 36 (39.6)             | 21 (32.3)                                        | 15 (57.7)                                     |         |
| Vital status                        |                       |                                                  |                                               |         |
| Alive                               | 38 (41.8)             | 33 (50.8)                                        | 5 (19.2)                                      |         |
| Dead                                | 53 (58.2)             | 32 (49.2)                                        | 21 (80.8)                                     |         |

41  
42 **Supplementary Table 2. Antibiotic cohort: acute lymphoblastic leukemia patient**  
43 **characteristics by exposure to piperacillin-tazobactam, imipenem-cilastatin, or**  
44 **meropenem (P-I-M).** Acute lymphoblastic leukemia (ALL) patients from Memorial Sloan Kettering  
45 Cancer Center (MSK) and the University of Pennsylvania (Penn) who received anti-CD19 CAR T  
46 cell immunotherapy (N= 91) were assessed based upon exposure to piperacillin-tazobactam,  
47 imipenem-cilastatin, or meropenem (P-I-M) antibiotics in the 30 days before CAR T infusion and  
48 evaluated for clinical characteristics and outcomes. The baseline and clinical characteristics of

49 the patients in each of these group was compared to assess for variables that are associated with  
50 exposure to these antibiotics. Vital status is noted within 24 months of follow-up after CAR T cell  
51 infusion.

52 Wilcoxon rank-sum tests were used to compare the pairwise association between continuous  
53 variables and a binary outcome, while Fisher's exact test was used to compare two categorical  
54 variables. Two-tailed P values less than 0.05 were considered statistically significant across all  
55 tests. All tests were two-sided and there was no adjustment for multiple comparisons.

56 *Abbreviations: IQR: inter-quartile range; ALL: acute lymphoblastic leukemia; ECOG: Eastern*  
57 *Cooperative Oncology Group; CRS: cytokine release syndrome; ICANS: immune effector cell-*  
58 *associated neurotoxicity syndrome; No P-I-M antibiotic exposure: patients exposed to non-P-I-M*  
59 *plus patients who did not receive any antibiotics within the 4 weeks before CD19 CAR T cell*  
60 *infusion*

61

### Supplementary Figure 1

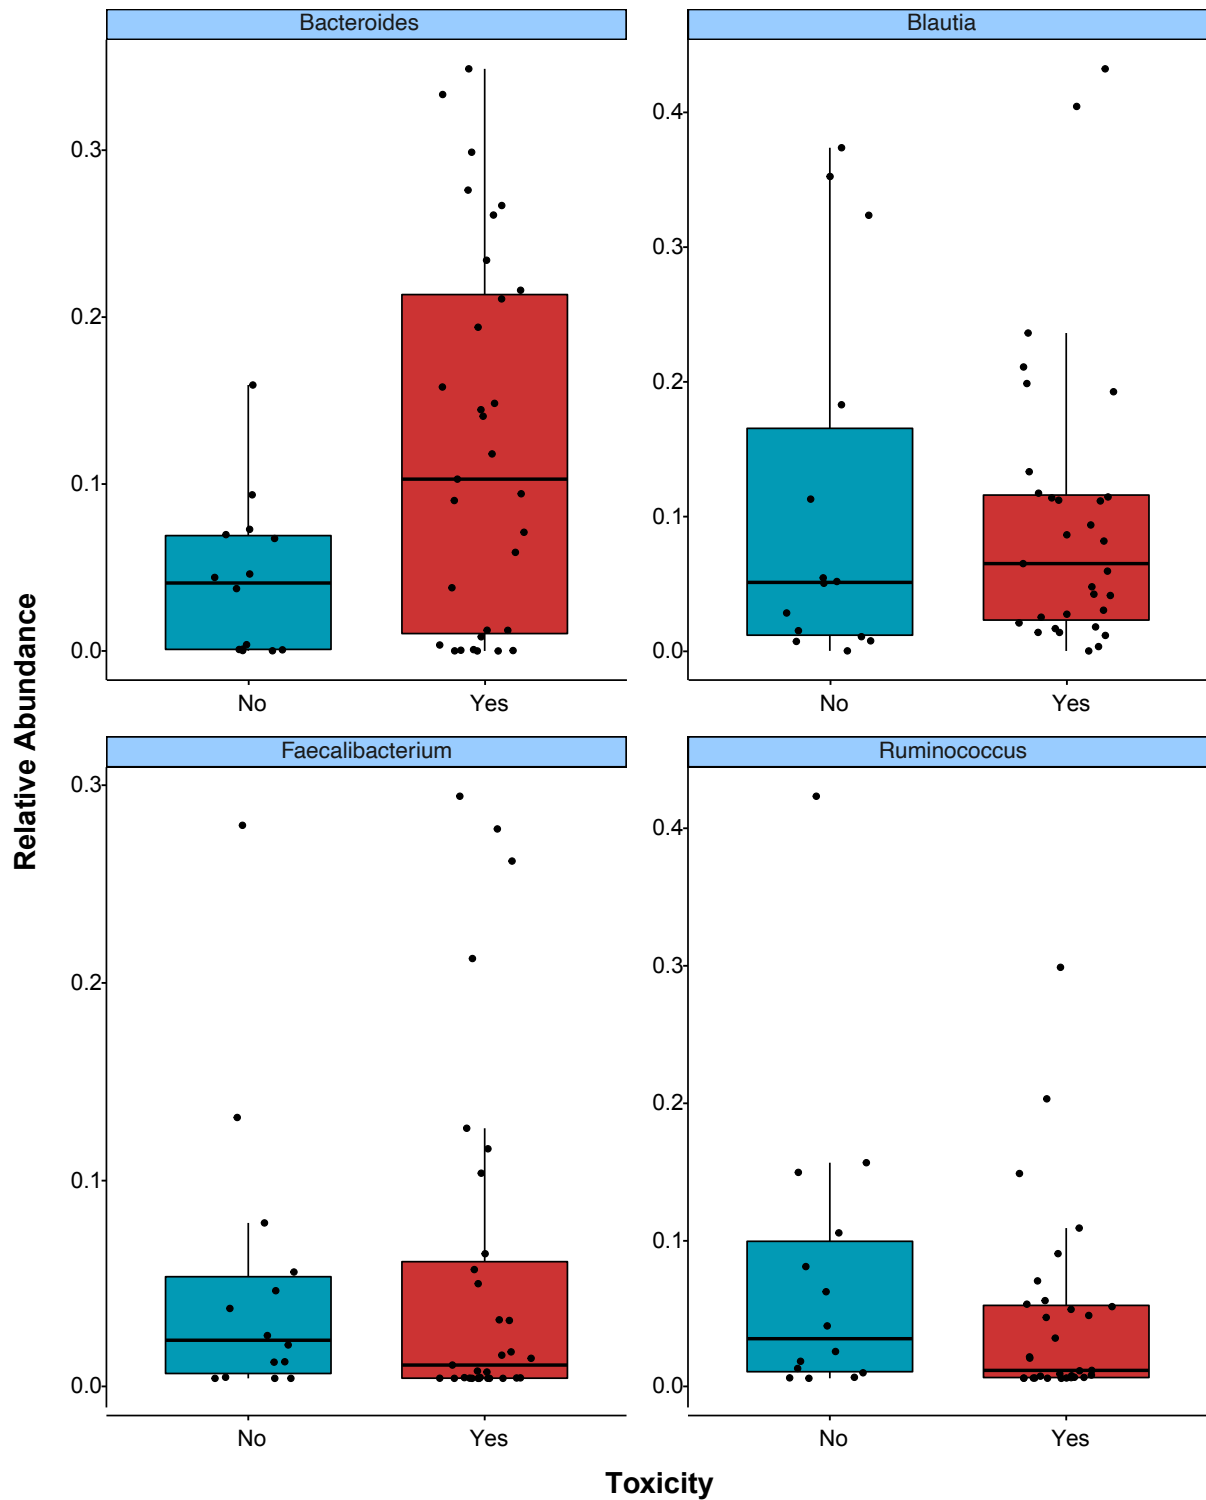

62

63 **Supplementary Figure 1. Boxplots of the relative abundance of selected taxa from LEfSe**

64 **of toxicity.** All data reported in this figure is based on 16S rRNA gene sequencing data from

65 patients (n= 45). The relative abundance of *Bacteroides*, *Blautia*, *Faecalibacterium*, and

66 *Ruminococcus* are presented. Data is categorized by patients who did not experience toxicity  
67 (No), and patients who experienced toxicity (Yes). Dots indicate relative abundance of the  
68 baseline fecal sample from a CAR T cell patient. Two-sided Wilcoxon rank-sum test was used to  
69 calculate the p-values, and the p-values were adjusted for multiple hypothesis testing.

70

71

72

73

74

75

76

77

78

79

80

81

82

83

84

Supplementary Figure 2

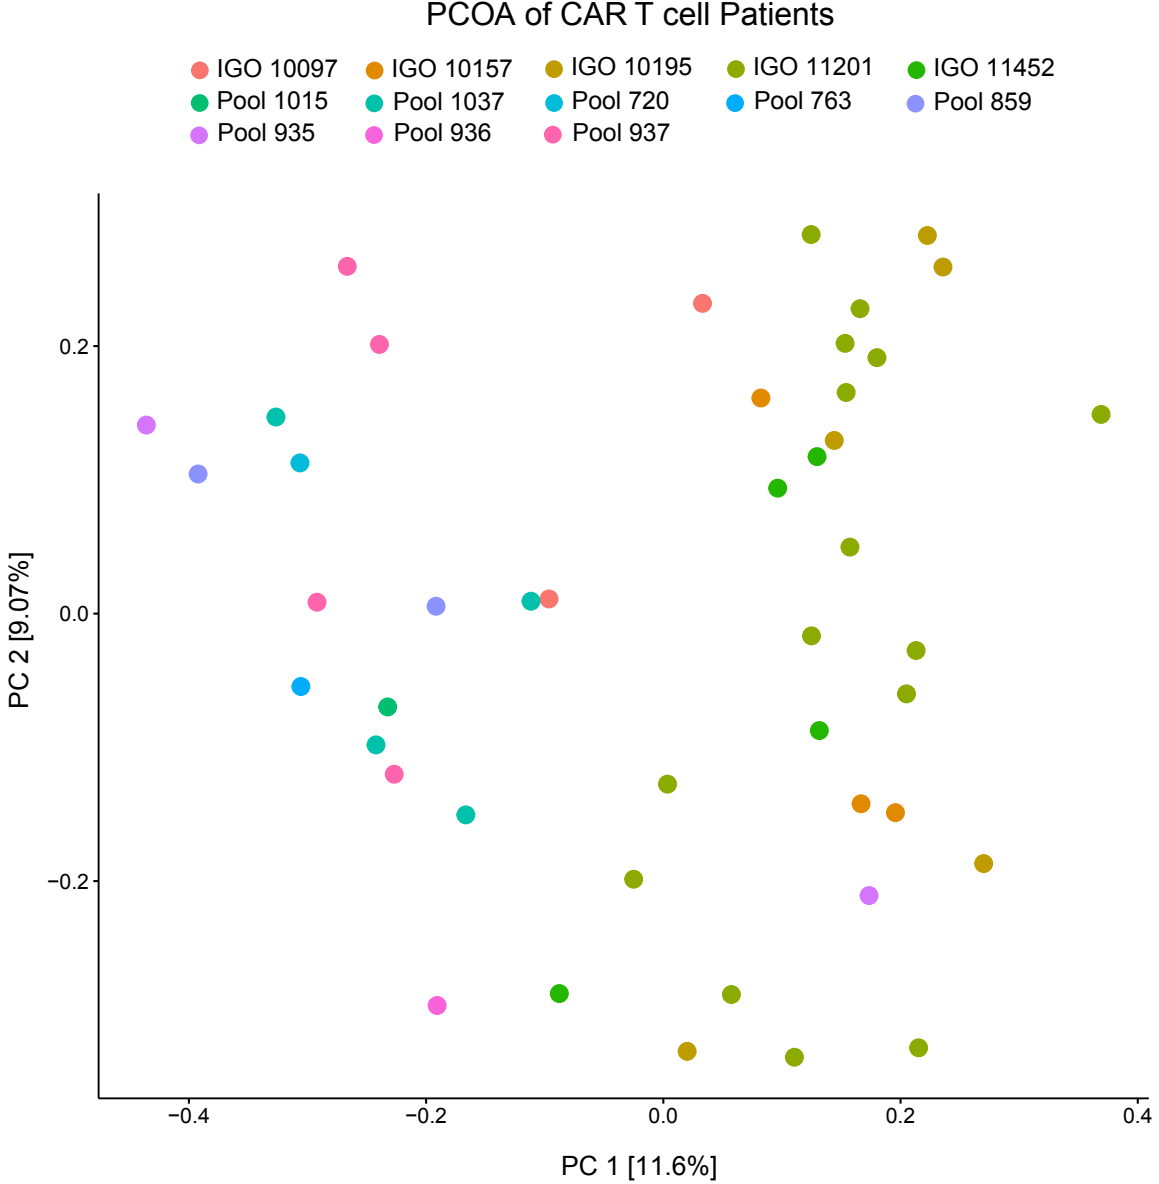

85  
86  
87  
88  
89  
90  
91  
92  
93

**Supplementary Figure 2. Principal Coordinates Analysis (PCoA) visualization of pools of 16S sequencing of baseline fecal samples from CAR T cell patients.** Composition diversity of baseline patient samples (n= 45) is displayed according to principal coordinates analysis (PCoA). Dots are colored to indicate the sequencing pools (n= 13). All data reported in this figure is based on 16S rRNA gene sequencing data.

### Supplementary Figure 3

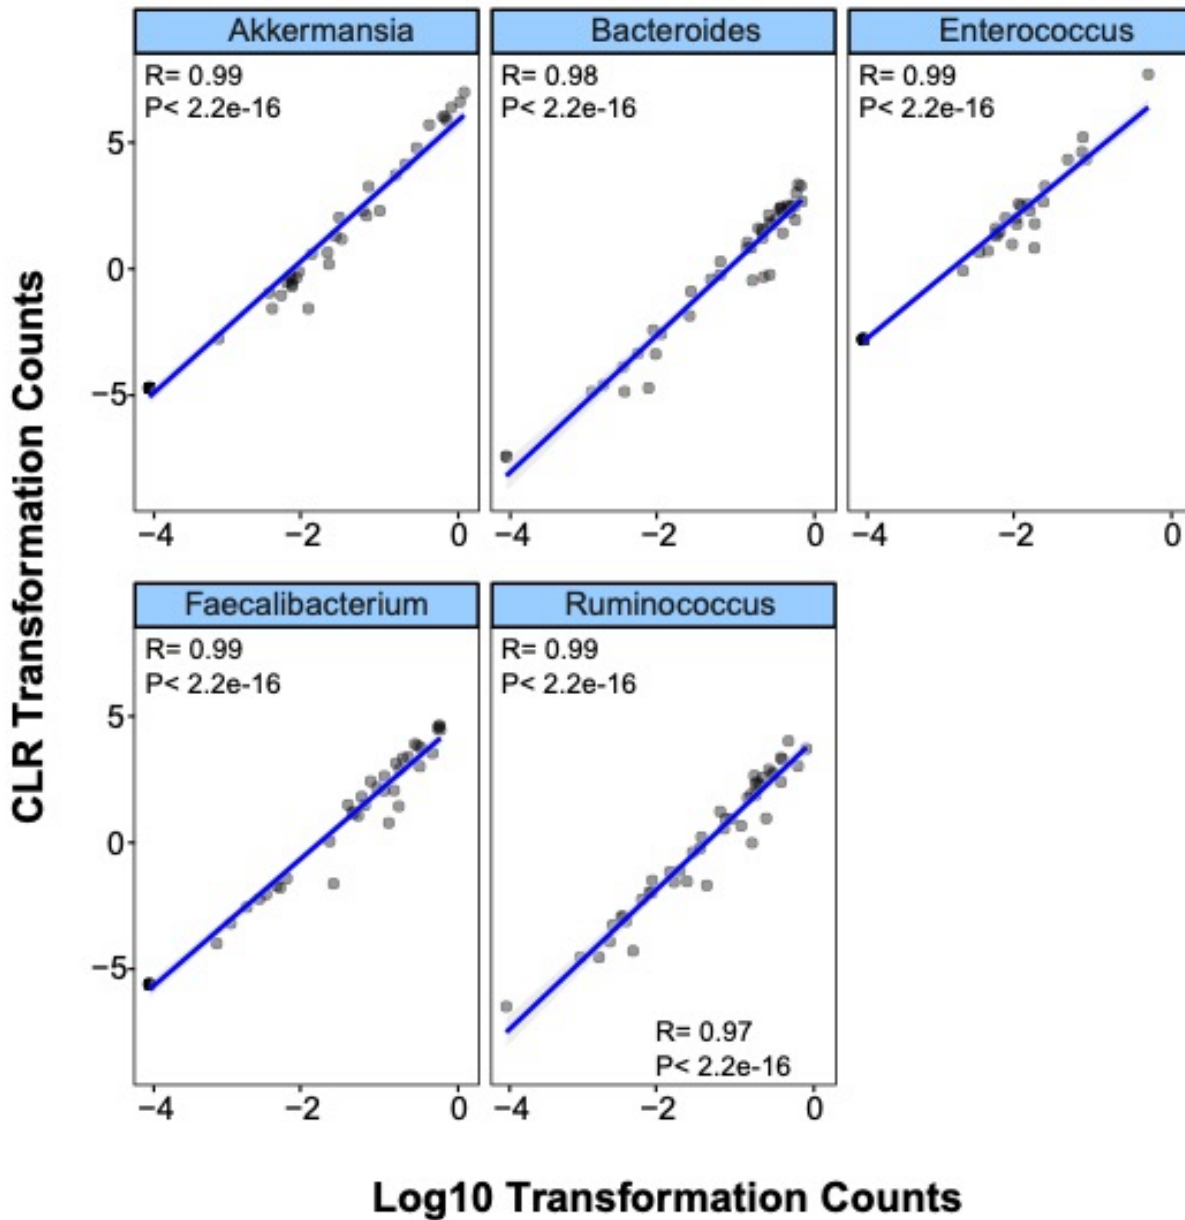

94

95 **Supplementary Figure 3. Correlation between the centered log-ratio and the log<sub>10</sub>**

96 **transformed counts for the five genera.** Scatter plots show the Pearson correlation between

97 the centered log-ratio and the log<sub>10</sub> transformed counts for the five genera in the Bayesian model.

98 All data reported in this figure are based on 16S rRNA gene sequencing data.

99 *Abbreviations: CLR: centered log-ratio*

100

101
